# Supplementary material for: Earth system music: music generated from the United Kingdom Earth System Model (UKESM1)
Source: Copernicus journal article supplement (doi:10.5194/gc-3-263-2020), 2020-09-11
Supplement: Supplementary file 1 [file gc-3-263-2020-supplement.zip]

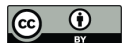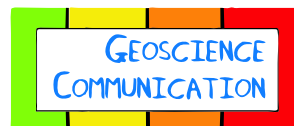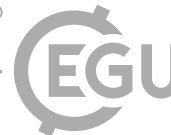

## *Supplement of*

# **Earth system music: music generated from the United Kingdom Earth System Model (UKESM1)**

**Lee de Mora et al.**

*Correspondence to:* Lee de Mora ([ledm@pml.ac.uk](mailto:ledm@pml.ac.uk))

- [gc-3-263-2020-supplement-title-page.pdf](#)
- [Earth\\_System\\_Allegro.pdf](#)
- [Giant\\_steps\\_spin\\_up.pdf](#)
- [Pre-industrial\\_vivace.pdf](#)
- [Sea\\_Surface\\_Temperature\\_Aria.pdf](#)

The copyright of individual parts of the supplement might differ from the CC BY 4.0 License.
